# Supplementary material for: Problematic Facebook use and problematic video gaming as mediators of relationship between impulsivity and life satisfaction among female and male gamers
Source: PubMed Central journal article supplement (PMC7437455; doi:10.1371/journal.pone.0237610), 2020-08-18

S1. Schemas of eight theoretical models:

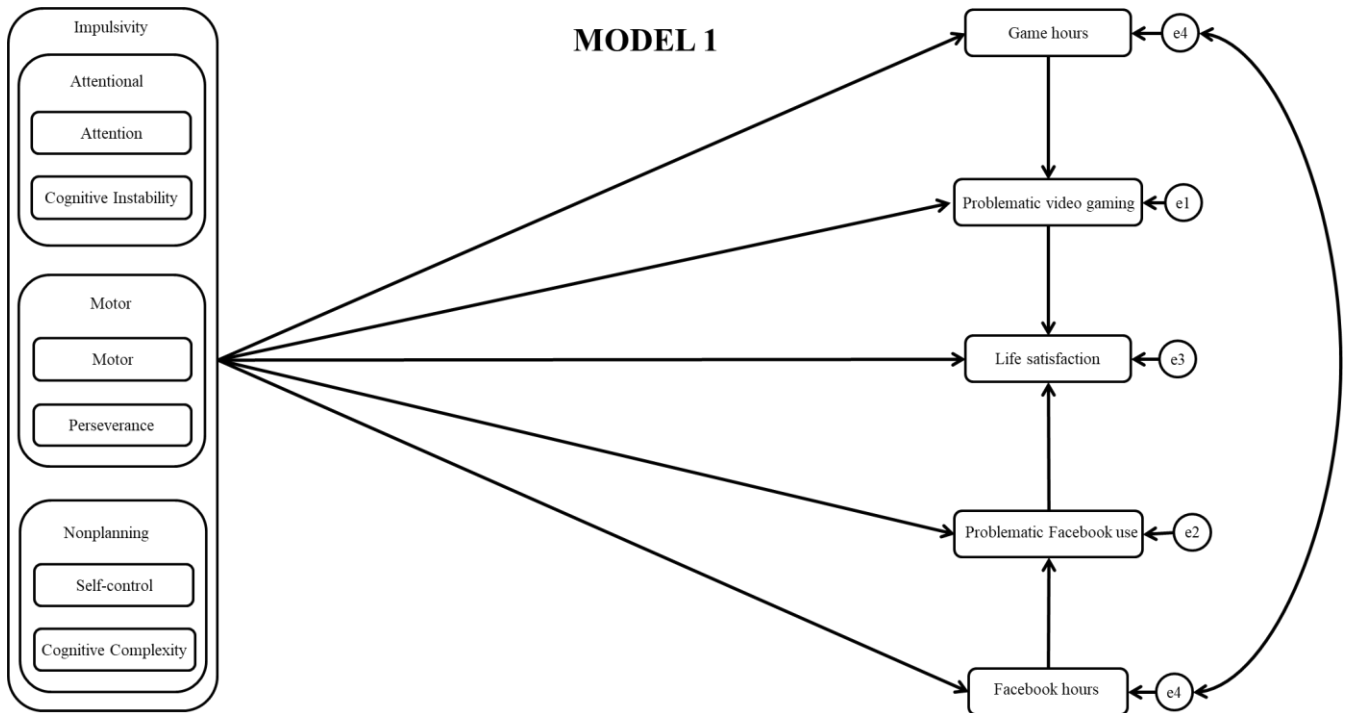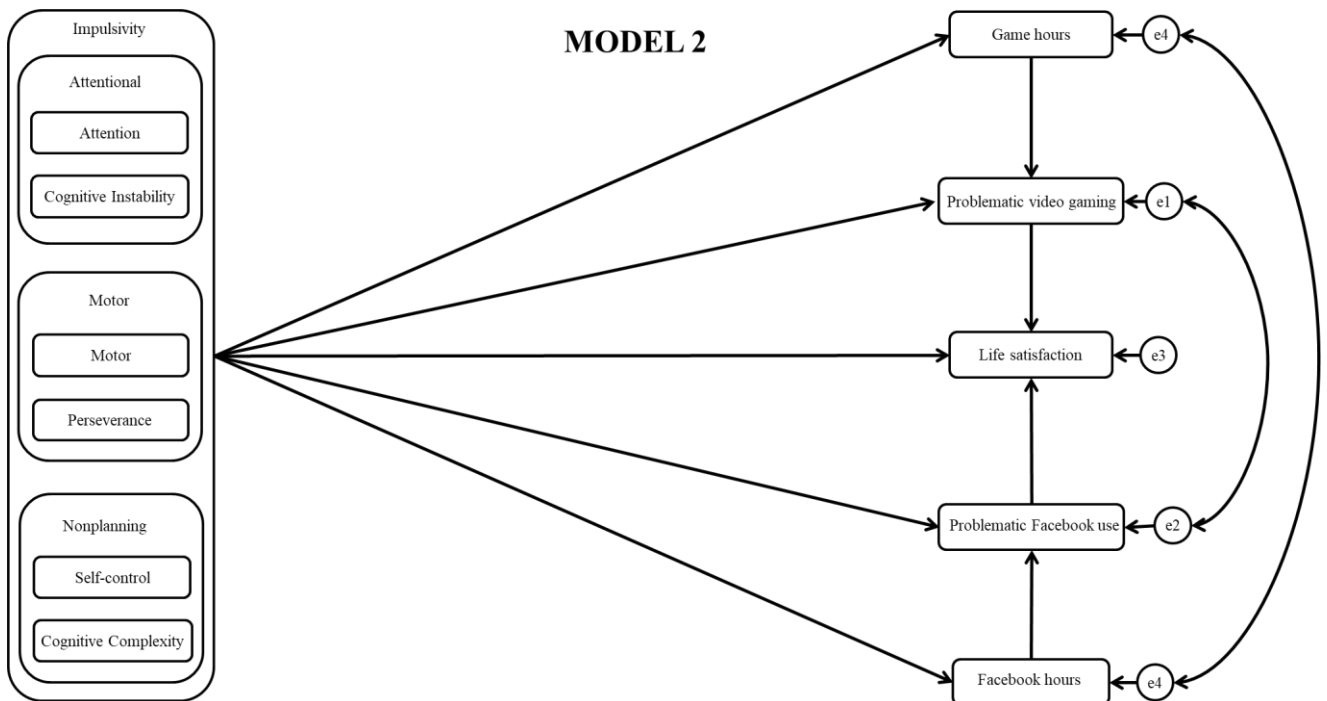

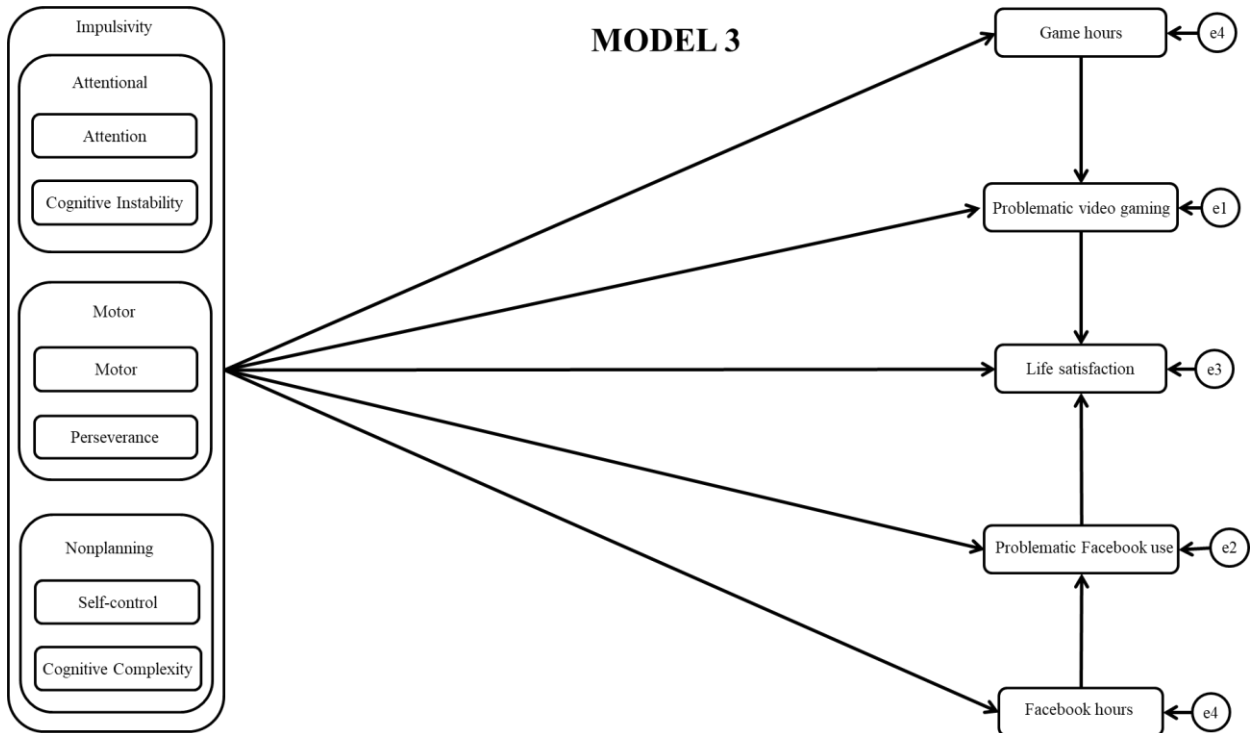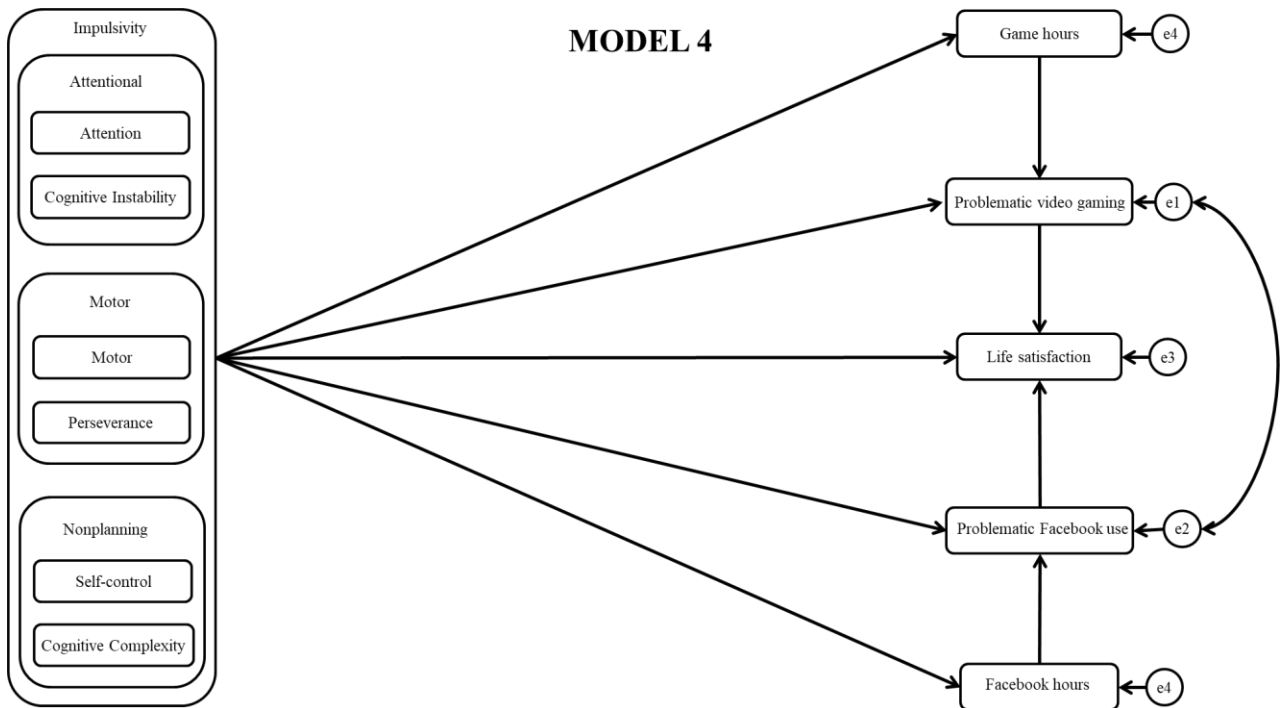

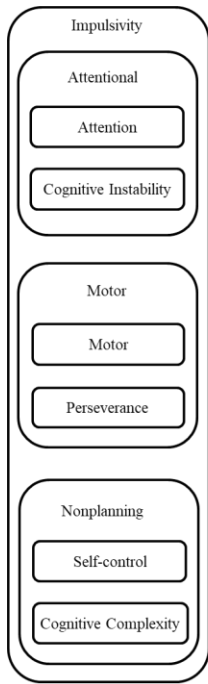

**MODEL 5**

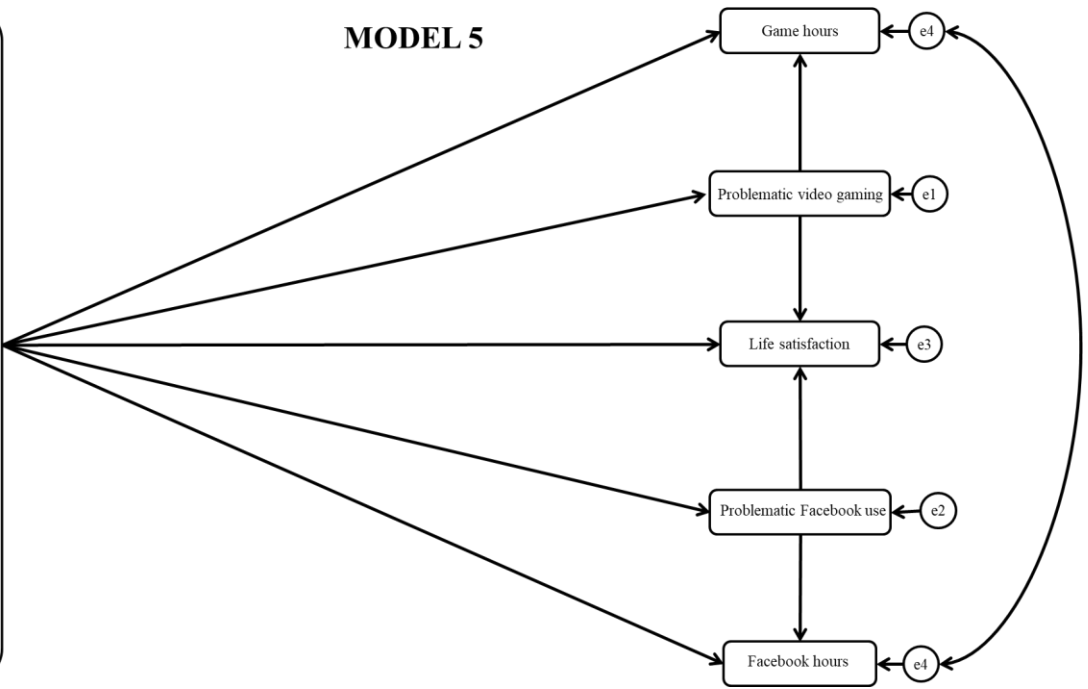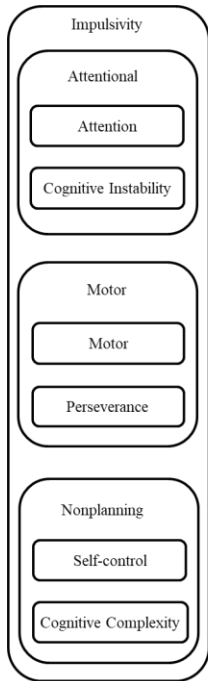

**MODEL 6**

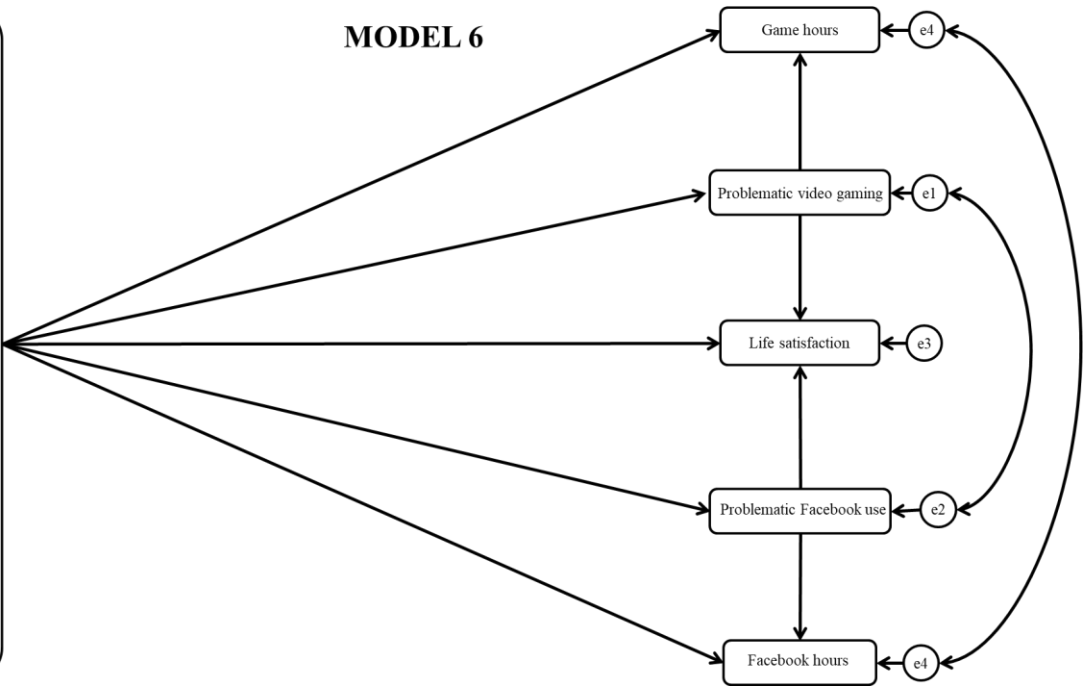

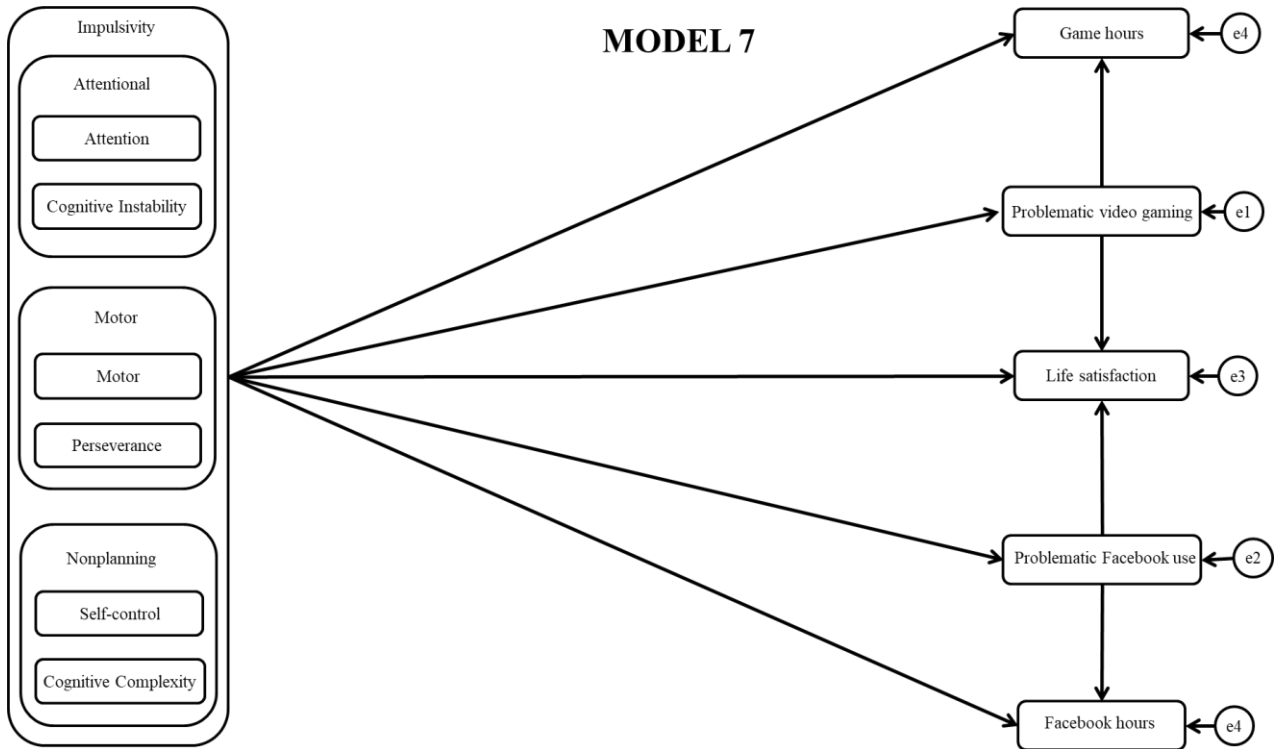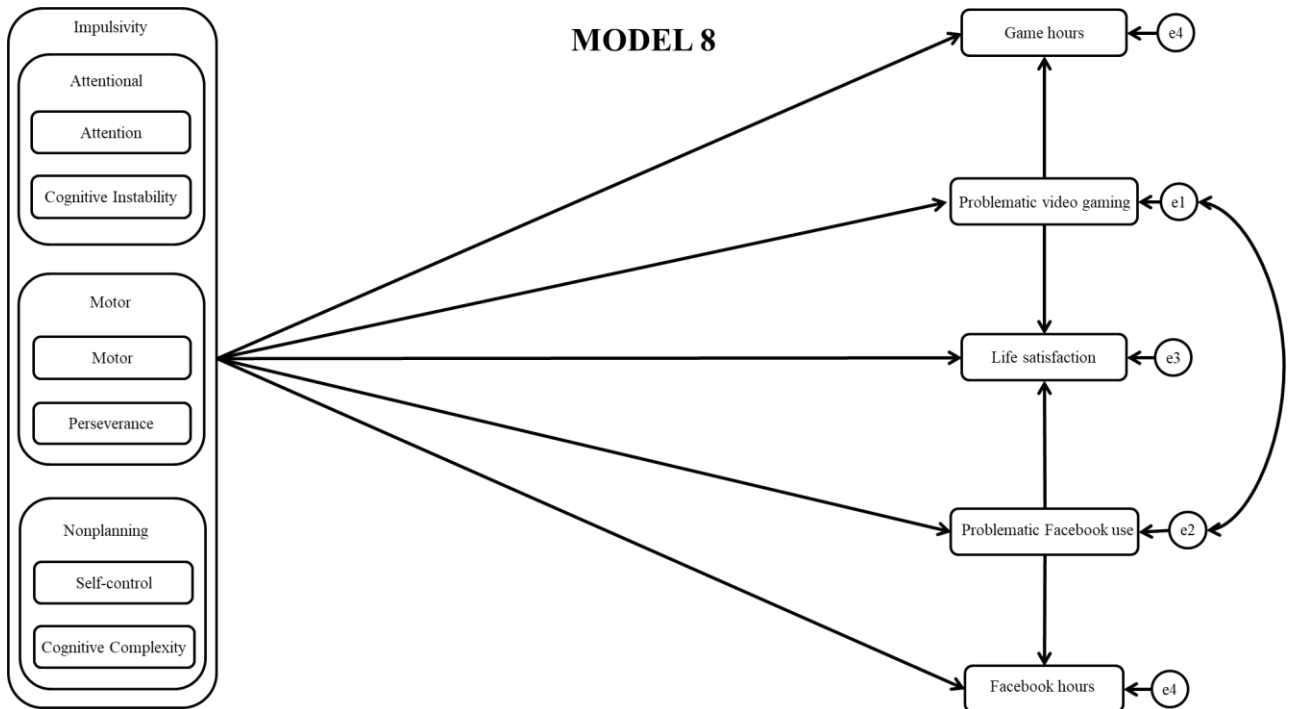

Supplement: pone.0237610.s001.pdf [file pone.0237610.s001.pdf]
