# Supplementary material for: Problematic Facebook use and problematic video gaming as mediators of relationship between impulsivity and life satisfaction among female and male gamers
Source: PubMed Central journal article supplement (PMC7437455; doi:10.1371/journal.pone.0237610), 2020-08-18
Supplement: pone.0237610.s002.pdf [file pone.0237610.s002.pdf]

S2. The Kolmogorov-Smirnov test for normality.

| Variables                         |                                    | Male gamers<br>(N = 282) |       | Female gamers<br>(N = 391) |       |
|-----------------------------------|------------------------------------|--------------------------|-------|----------------------------|-------|
|                                   |                                    | K-S                      | p<    | K-S                        | p<    |
| Problematic Facebook use          |                                    | 0.10                     | 0.001 | 0.09                       | 0.001 |
| Facebook number of hours per week |                                    | 0.23                     | 0.001 | 0.26                       | 0.001 |
| Problematic video gaming          |                                    | 0.09                     | 0.001 | 0.19                       | 0.001 |
| Game number of hours per week     |                                    | 0.18                     | 0.001 | 0.29                       | 0.001 |
| Impulsivity                       | Attentional - Attention            | 0.14                     | 0.001 | 0.11                       | 0.001 |
|                                   | Attentional –Cognitive instability | 0.13                     | 0.001 | 0.12                       | 0.001 |
|                                   | Motor - Motor                      | 0.10                     | 0.001 | 0.09                       | 0.001 |
|                                   | Motor - Perseverance               | 0.17                     | 0.001 | 0.17                       | 0.001 |
|                                   | Nonplanning – Self control         | 0.10                     | 0.001 | 0.09                       | 0.001 |
|                                   | Nonplanning – Cognitive complexity | 0.10                     | 0.001 | 0.10                       | 0.001 |
|                                   | Total                              | 0.07                     | 0.003 | 0.06                       | 0,001 |
| Life satisfaction                 |                                    | 0.08                     | 0.001 | 0.07                       | 0.001 |
