# Supplementary material for: Problematic Facebook use and problematic video gaming as mediators of relationship between impulsivity and life satisfaction among female and male gamers
Source: PubMed Central journal article supplement (PMC7437455; doi:10.1371/journal.pone.0237610), 2020-08-18
Supplement: pone.0237610.s003.pdf [file pone.0237610.s003.pdf]

S3. Correlation coefficients between impulsivity dimensions.

| Variables/groups                            | r    | SE   | z     | p     | 95%CI |      |
|---------------------------------------------|------|------|-------|-------|-------|------|
| Attention, Cognitive instability            |      |      |       |       |       |      |
| Female gamers                               | 0.24 | 0.05 | 5.11  | 0.001 | 0.15  | 0.33 |
| Male gamers                                 | 0.39 | 0.05 | 8.34  | 0.001 | 0.30  | 0.48 |
| Attention, Motor                            |      |      |       |       |       |      |
| Female gamers                               | 0.27 | 0.05 | 5.43  | 0.001 | 0.17  | 0.36 |
| Male gamers                                 | 0.44 | 0.05 | 9.28  | 0.001 | 0.35  | 0.53 |
| Attention, Perseverance                     |      |      |       |       |       |      |
| Female gamers                               | 0.29 | 0.04 | 6.41  | 0.001 | 0.20  | 0.38 |
| Male gamers                                 | 0.40 | 0.05 | 7.65  | 0.001 | 0.30  | 0.50 |
| Attention, Self-control                     |      |      |       |       |       |      |
| Female gamers                               | 0.38 | 0.05 | 8.03  | 0.001 | 0.29  | 0.47 |
| Male gamers                                 | 0.49 | 0.05 | 10.57 | 0.001 | 0.40  | 0.58 |
| Attention, Cognitive complexity             |      |      |       |       |       |      |
| Female gamers                               | 0.31 | 0.04 | 6.92  | 0.001 | 0.22  | 0.39 |
| Male gamers                                 | 0.45 | 0.05 | 9.01  | 0.001 | 0.35  | 0.55 |
| Cognitive instability, Motor                |      |      |       |       |       |      |
| Female gamers                               | 0.36 | 0.05 | 7.84  | 0.001 | 0.27  | 0.45 |
| Male gamers                                 | 0.46 | 0.05 | 9.27  | 0.001 | 0.37  | 0.56 |
| Cognitive instability, Perseverance         |      |      |       |       |       |      |
| Female gamers                               | 0.25 | 0.05 | 5.44  | 0.001 | 0.16  | 0.34 |
| Male gamers                                 | 0.17 | 0.06 | 3.00  | 0.003 | 0.06  | 0.28 |
| Cognitive instability, Self-control         |      |      |       |       |       |      |
| Female gamers                               | 0.14 | 0.05 | 2.90  | 0.004 | 0.05  | 0.24 |
| Male gamers                                 | 0.25 | 0.05 | 4.78  | 0.001 | 0.15  | 0.35 |
| Cognitive instability, Cognitive complexity |      |      |       |       |       |      |
| Female gamers                               | 0.02 | 0.05 | 0.40  | 0.690 | -0.08 | 0.12 |
| Male gamers                                 | 0.21 | 0.06 | 3.63  | 0.001 | 0.10  | 0.33 |
| Motor, Perseverance                         |      |      |       |       |       |      |
| Female gamers                               | 0.27 | 0.05 | 5.75  | 0.001 | 0.18  | 0.37 |
| Male gamers                                 | 0.42 | 0.05 | 7.82  | 0.001 | 0.32  | 0.53 |
| Motor, Self-control                         |      |      |       |       |       |      |
| Female gamers                               | 0.55 | 0.04 | 14.58 | 0.001 | 0.47  | 0.62 |
| Male gamers                                 | 0.49 | 0.05 | 9.13  | 0.001 | 0.38  | 0.59 |
| Motor, Cognitive complexity                 |      |      |       |       |       |      |
| Female gamers                               | 0.24 | 0.05 | 4.86  | 0.001 | 0.14  | 0.34 |
| Male gamers                                 | 0.42 | 0.05 | 8.37  | 0.001 | 0.32  | 0.52 |
| Perseverance, Self-control                  |      |      |       |       |       |      |
| Female gamers                               | 0.23 | 0.05 | 4.40  | 0.001 | 0.13  | 0.33 |
| Male gamers                                 | 0.32 | 0.05 | 5.89  | 0.001 | 0.21  | 0.42 |
| Perseverance, Cognitive complexity          |      |      |       |       |       |      |
| Female gamers                               | 0.30 | 0.04 | 6.92  | 0.001 | 0.22  | 0.39 |
| Male gamers                                 | 0.39 | 0.05 | 7.31  | 0.001 | 0.29  | 0.50 |
| Self-control, Cognitive complexity          |      |      |       |       |       |      |
| Female gamers                               | 0.29 | 0.05 | 6.04  | 0.001 | 0.20  | 0.38 |
| Male gamers                                 | 0.46 | 0.04 | 10.33 | 0.001 | 0.37  | 0.55 |
